# Supplementary material for: Curcumin release from hydrogels incorporated with turmeric extract–cyclodextrin complexes for wound dressing applications
Source: Royal Society of Chemistry journal article supplement (doi:10.1039/d6ra00713a), 2026-05-11
Supplement: d6ra00713a1.pdf [file d6ra00713a1.pdf]

## Supplementary Materials

### Curcumin Release from Hydrogels Incorporated with Turmeric Extract-Cyclodextrin Complexes for Wound Dressing Applications

Rawita Morarad, Pennapa Karawak, Pranita Meepean, Natawan Sritapanya, Pattaraphorn Panomai, Niti Yongvanich, Pimpon Uttayarat\*

#### S1. Incorporation of TECD in hydrogels

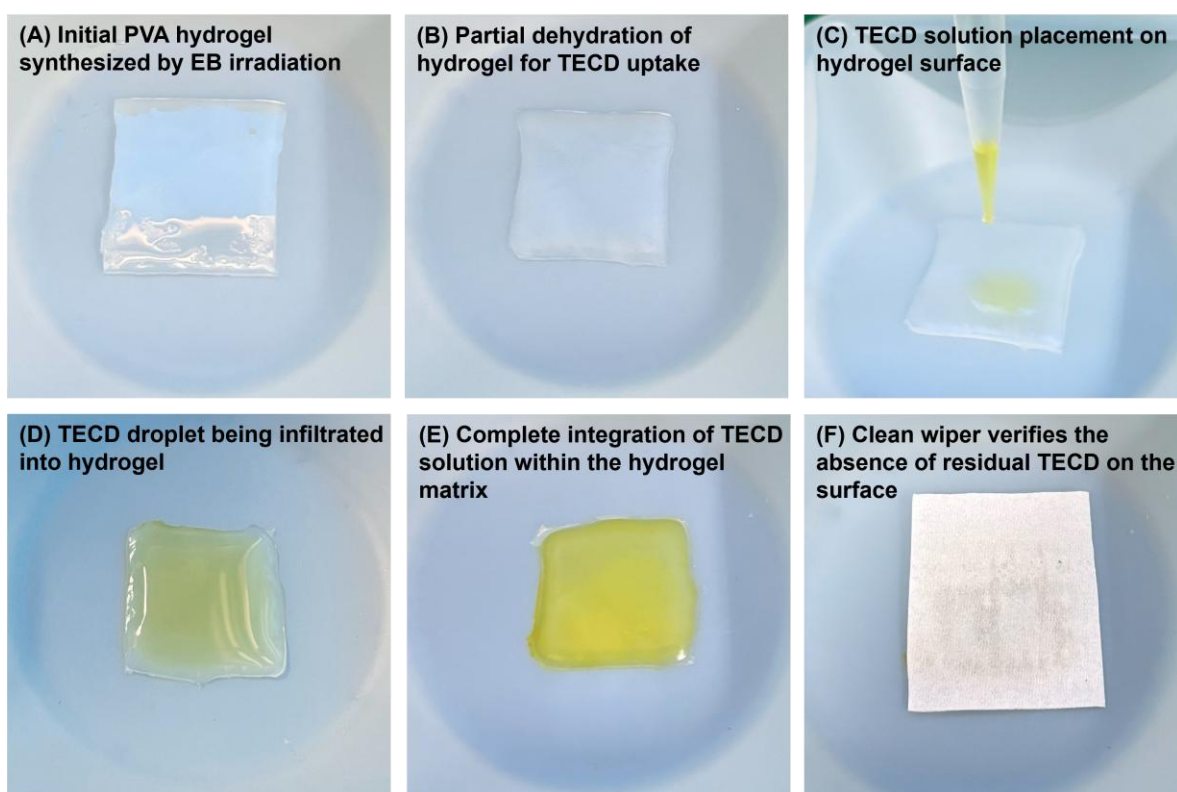

**Fig. S1** Incorporation of TECD solution into PVA hydrogel. (A) Initial PVA hydrogel synthesized by electron beam (EB) irradiation; (B) Partial dehydration of hydrogel for TECD uptake; (C) TECD solution placement on hydrogel surface; (D) TECD droplet being infiltrated into hydrogel; (E) Complete integration of TECD solution within the hydrogel matrix; and (F) Clean wiper verifies the absence of residual TECD on the surface.

## S2. Curcumin release of 10TECD-loaded hydrogels

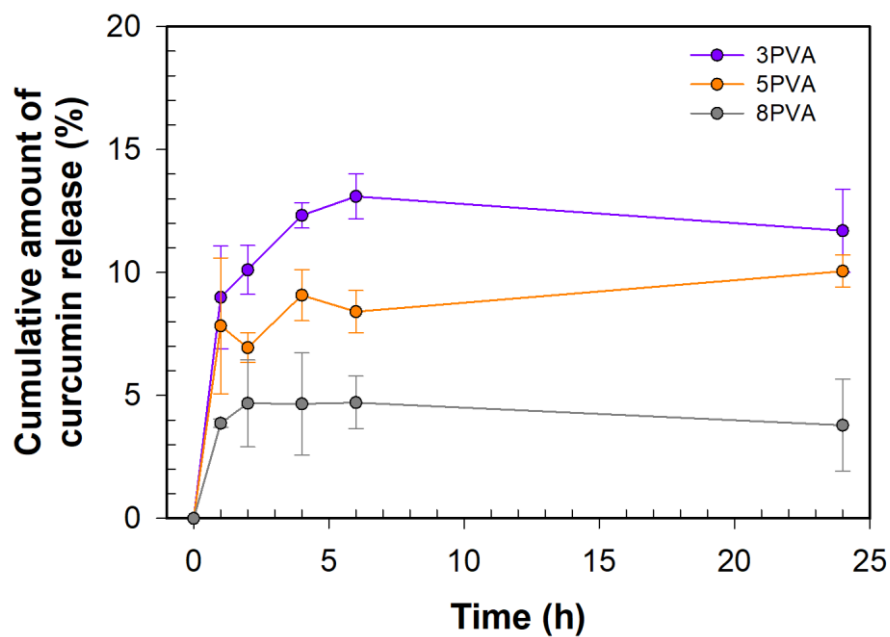

**Fig. S2** Curcumin release profiles of 10TECD-loaded hydrogels.
